# Supplementary material
Source: HighWire-hosted journal article supplement (http://ajnr-stage2.highwire.org/highwire/filestream/56620/field_highwire_adjunct_files/0/17-00367.pdf)
Supplement: 17-00367.pdf [file 17-00367.pdf]

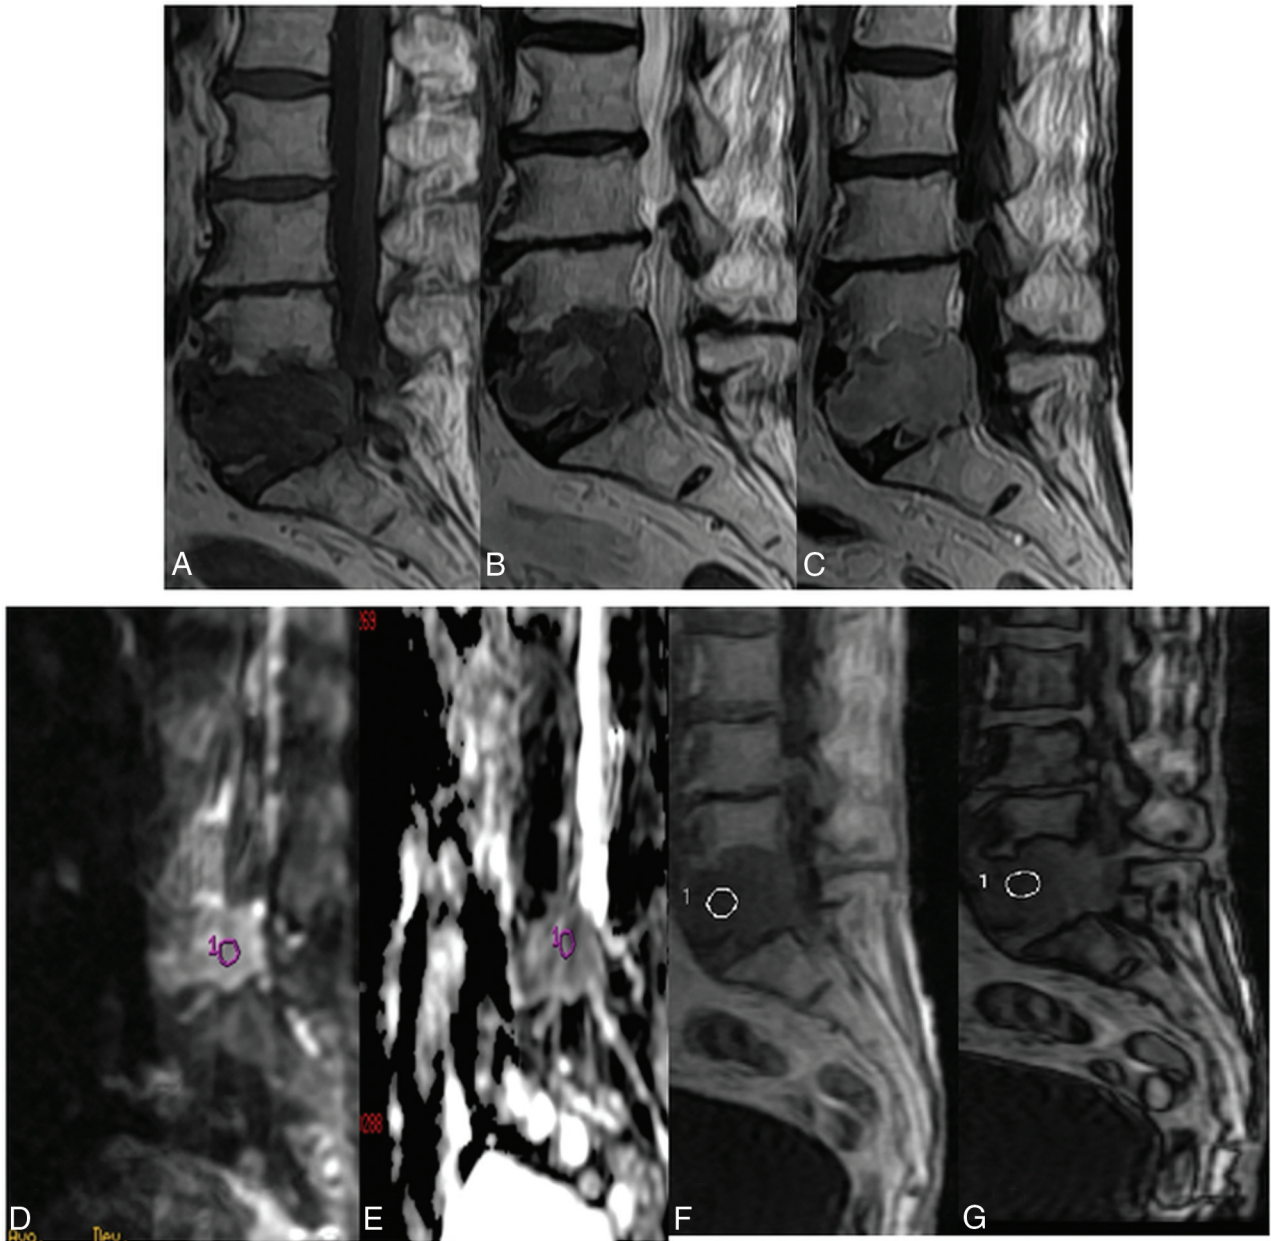

**ON-LINE FIG 1.** A 55-year-old man with biopsy-proved vertebral inflammatory pseudotumor of the L5 vertebra has a mildly expansile hypointense lesion on T1-weighted (A) and T2-weighted (B) images, with involvement of the adjacent intervertebral disc space, erosion of the endplates, and a convex posterior vertebral margin; however, no obvious areas of necrosis/abscess formation or involvement of posterior elements, preparavertebral space, or any other vertebrae are noted. The lesion shows diffuse enhancement on the contrast study (C). Despite the expansile lesion with endplate destruction, the lesion is not hyperintense on DWI (D). The ADC measured from the L5 vertebral body is  $1.3 \times 10^{-3} \text{ mm}^2/\text{s}$  (E). Sagittal in-phase (F) and opposed-phase (G) images with the ROI cursor drawn in the lesion are shown. The measured SIR is 0.64.

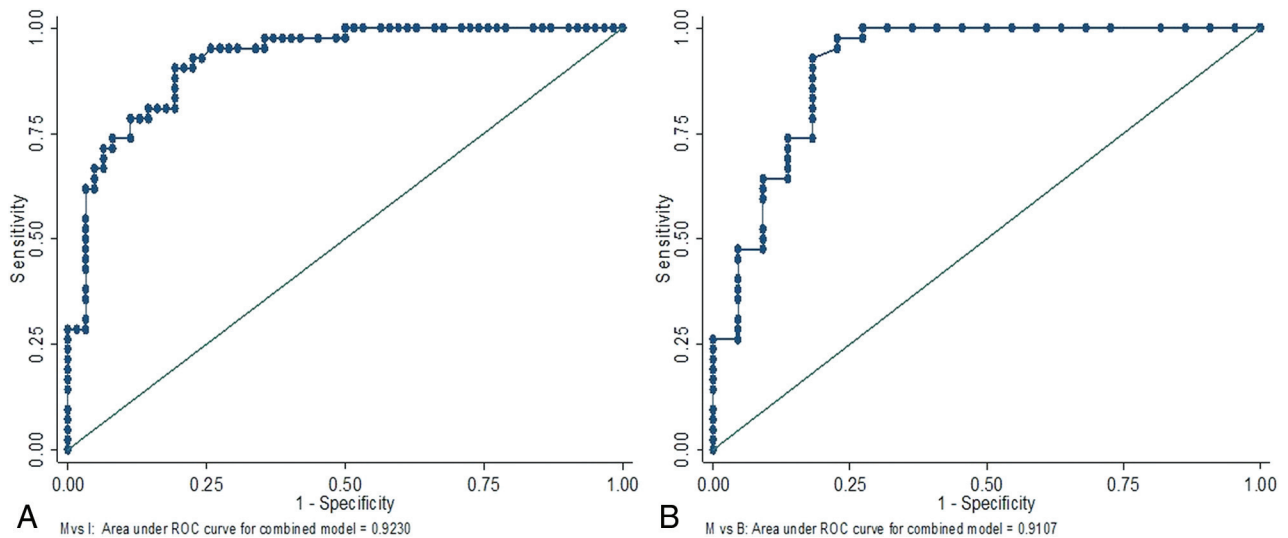

**ON-LINE FIG 2.** Receiver operating characteristic curve of our proposed models. A, Model 1 (infectious versus malignant lesions). B, Model 2 (noninfectious benign versus malignant lesions). The AUC for model 1 was 0.92, while the AUC for model 2 was 0.91. B indicates noninfectious benign lesions; I, infectious lesions; M, malignant lesions.

**On-line Table 1: Summary of infectious, noninfectious benign, and malignant lesions**

| Infectious (n = 62) |                   | Noninfectious Benign (n = 22) |                                                                                                                                                            | Malignant (n = 42)                                                                                                                                                                                                                                               |                                                                                                                                                    |
|---------------------|-------------------|-------------------------------|------------------------------------------------------------------------------------------------------------------------------------------------------------|------------------------------------------------------------------------------------------------------------------------------------------------------------------------------------------------------------------------------------------------------------------|----------------------------------------------------------------------------------------------------------------------------------------------------|
| Tubercular (n = 51) | Pyogenic (n = 11) | Osteoporotic (n = 14)         | Hemangioma (n = 2)<br>Meningioma (n = 1)<br>Vertebral inflammatory pseudotumor (n = 1)<br>Chronic inflammatory (noninfectious inflammatory lesion) (n = 4) | Metastasis (n = 36)<br>Adenocarcinoma (n = 9)<br>Squamous cell carcinoma (n = 12)<br>Ductal carcinoma (n = 5)<br>Follicular carcinoma (n = 3)<br>Clear cell carcinoma (n = 3)<br>Sarcoma (n = 2)<br>Transitional cell carcinoma (n = 1)<br>Neuroblastoma (n = 1) | Primary (n = 6)<br>Plasmacytoma (n = 3)<br>Malignant giant cell tumor (n = 1)<br>Primitive neuroectodermal tumor (n = 1)<br>Rhabdoid tumor (n = 1) |

**On-line Table 2: ADC and SIR for GPI, GPN, and GPM lesions**

|     | GPI  |      | GPN  |      | GPM  |      | Overall<br>P Value | GPI vs GPN           |  | GPI vs GPM           |  | GPN vs GPM           |  |
|-----|------|------|------|------|------|------|--------------------|----------------------|--|----------------------|--|----------------------|--|
|     | Mean | SD   | Mean | SD   | Mean | SD   |                    | P Value <sup>a</sup> |  | P Value <sup>a</sup> |  | P Value <sup>a</sup> |  |
| ADC | 1.23 | 0.16 | 1.41 | 0.31 | 1.01 | 0.22 | .000               | .002                 |  | .000                 |  | .000                 |  |
| SIR | 0.80 | 0.13 | 0.75 | 0.19 | 0.98 | 0.11 | .000               | .460                 |  | .000                 |  | .000                 |  |

<sup>a</sup> Bonferroni-adjusted P value.

**On-line Table 3: The cutoffs for ADC and SIR for differentiating various groups**

| Condition      | Test | Cutoff | SE    | Sp    | CC    | LR+  | LR-  | AUC  | 95% CI    |
|----------------|------|--------|-------|-------|-------|------|------|------|-----------|
| GPI vs GPM     | ADC  | ≥1.0   | 96.8% | 69.1% | 85.6% | 3.13 | 0.05 | 0.82 | 0.73–0.92 |
| GPN vs GPM     | ADC  | ≥1.2   | 86.4% | 78.6% | 81.3% | 4.03 | 0.17 | 0.89 | 0.81–0.96 |
| GPN vs GPI     | ADC  | ≥1.3   | 72.7% | 59.7% | 63.1% | 1.80 | 0.46 | 0.70 | 0.56–0.84 |
| GPN+GPI vs GPM | ADC  | ≥1.0   | 96.4% | 69.1% | 87.3% | 3.12 | 0.05 | 0.84 | 0.75–0.93 |
| GPM vs GPI     | SIR  | ≥0.91  | 85.7% | 85.5% | 85.6% | 5.90 | 0.17 | 0.90 | 0.84–0.96 |
| GPM vs GPN     | SIR  | ≥0.90  | 88.1% | 77.3% | 84.4% | 3.88 | 0.15 | 0.86 | 0.76–0.97 |
| GPI vs GPN     | SIR  | ≥0.65  | 93.6% | 36.4% | 78.6% | 1.47 | 0.18 | 0.56 | 0.40–0.73 |
| GPN+GPI vs GPM | SIR  | ≥0.91  | 85.7% | 83.3% | 84.1% | 5.14 | 0.17 | 0.89 | 0.83–0.95 |

**Note:**—LR+ indicates positive likelihood ratio; LR–, negative likelihood ratio; CC, correct classification.

**On-line Table 4: Combined models for differentiating various groups**

|          | Model 1: GPM vs GPI      |         | Model 2: GPM vs GPN    |         | Model 3: GPM vs GPN+GPI |         |
|----------|--------------------------|---------|------------------------|---------|-------------------------|---------|
|          | RC (95% CI)              | P Value | RC (95% CI)            | P Value | RC (95% CI)             | P Value |
| ADC      | −5.67 (−8.79 to −2.55)   | <.001   | −4.59 (−7.61 to −1.57) | .003    | −5.42 (−8.26 to −2.58)  | <.001   |
| SIR      | 18.35 (9.7 to 27.01)     | <.001   | 13.33 (3.7 to 22.97)   | .007    | 15.27 (8.09 to 22.45)   | <.001   |
| Constant | −10.50 (−18.52 to −2.47) | .01     | −5.93 (−14.82 to 2.96) | .191    | −8.25 (−15.4 to −1.11)  | .024    |
| CC-LOO   | 82.7%                    |         | 89.1%                  |         | 84.1%                   |         |
| AUC-LOO  | 0.91                     |         | 0.88                   |         | 0.90                    |         |

**Note:**—RC indicates regression coefficient; CC-LOO, correct classification leave-one-out cross-validation analysis; AUC-LOO, area under the curve on leave-one-out cross-validation analysis.

**On-line Table 5: The cutoffs for probability of malignant lesions in different predictive models**

| Model | Cutoff | SE    | Sp    | CC    | LR+  | LR−  | AUC  | 95% CI    |
|-------|--------|-------|-------|-------|------|------|------|-----------|
| 1     | ≥0.39  | 81.0% | 80.7% | 80.8% | 4.18 | 0.24 | 0.92 | 0.87–0.97 |
| 2     | ≥0.68  | 83.3% | 81.8% | 82.8% | 4.58 | 0.20 | 0.91 | 0.82–1.00 |
| 3     | ≥0.32  | 83.3% | 82.1% | 82.5% | 4.67 | 0.20 | 0.92 | 0.87–0.97 |

**Note:**—LR+ indicates positive likelihood ratio; LR−, negative likelihood ratio; CC, correct classification.
